# Supplementary material for: Adsorption of Hexavalent Chromium Using Activated Carbon Produced from Sargassum ssp.: Comparison between Lab Experiments and Molecular Dynamics Simulations
Source: MDPI journal article supplement (doi:10.3390/molecules27186040), 2022-09-16

# Supplementary Materials

## **Adsorption of hexavalent chromium using activated carbon produced from *Sargassum spp*: Comparison between lab experiments and molecular dynamic simulations**

**Yeray Alvarez-Galvan<sup>1,2</sup>, Babak Minofar<sup>3\*</sup>, Zdeněk Futera<sup>4</sup>, Marckens Francoeur<sup>1</sup>, Corine Jean-Marius<sup>1</sup>, Nicolas Brehm<sup>2</sup>, C. Yacou<sup>1</sup>, Ulises J. Jauregui-Haza<sup>5</sup>, S. Gaspard<sup>1\*</sup>**

<sup>1</sup> Laboratoire COVACHIM-M2E, Université des Antilles, Campus de Fouillole, 97157, Pointe à Pitre Cedex, Guadeloupe.

<sup>2</sup> NBC SARL Company, 8, Rue Saint Cyr, résidence Océane - Apt n°5 – 97300, Cayenne

<sup>3</sup> Laboratory of Structural Biology and Bioinformatics, Institute of Microbiology of the Czech Academy of Sciences, Zamek 136, 37333 Nové Hradky, Czech Republic

<sup>4</sup> Faculty of Science University of South Bohemia in České Budějovice Branišovská 1760/31a, 37005, České Budějovice, Czech Republic

<sup>5</sup> Instituto Tecnológico de Santo Domingo (INTEC), Dominican Republic

**\*Corresponding authors:** Sarra Gaspard, Babak Minofar

Laboratoire COVACHIM-M2E, Université des Antilles, 97157, Pointe à Pitre Cedex, Guadeloupe.

Email address: [sarra.Gaspard@univ-antilles.fr](mailto:sarra.Gaspard@univ-antilles.fr); [minofar@nh.cas.cz](mailto:minofar@nh.cas.cz)

Tel.: +590 690 55 47 89

## Table of Contents

|                                                                                                                                                                                                                                                                                                                                                                            |   |
|----------------------------------------------------------------------------------------------------------------------------------------------------------------------------------------------------------------------------------------------------------------------------------------------------------------------------------------------------------------------------|---|
| <b>Table S 1.</b> Atomic type parameters: atomic masses [AMU] and Lennard-Jones-potential parameters $R$ [Å] and $\varepsilon$ [kcal/mol]. .....                                                                                                                                                                                                                           | 3 |
| <b>Table S 2.</b> Bond type parameters: harmonic-potential force constant $k_B$ [kcal/mol/Å <sup>2</sup> ] and equilibrium distance $r_0$ [Å]. .....                                                                                                                                                                                                                       | 4 |
| <b>Table S 3.</b> Valence-angle type parameters: harmonic-potential force constant $k_A$ [kcal/mol/deg <sup>2</sup> ] and equilibrium angle value $\phi_0$ [deg]. .....                                                                                                                                                                                                    | 4 |
| <b>Table S 4.</b> Dihedral-angle type parameters: force constant $k_D$ [kcal/mol], equilibrium angle value $\phi_0$ [deg] and periodicity $n$ (negative value denotes multi-term potential form). .....                                                                                                                                                                    | 4 |
| <b>Table S 5.</b> Comparison of vibrational frequencies [cm <sup>-1</sup> ] of vacuum Cr <sup>VI</sup> anions as calculated in DFT (PBE0/Aug-CC-pVDZ) and in force field (FF) using the fitted parameters. The frequencies were calculated by the harmonic-approximation approach from the second derivatives of the total energy with respect to atomic coordinates. .... | 4 |
| <br><b>Figure S 1.</b> Atom types (red symbols), atomic point charges (black numbers, atomic units) and indicated inter-atomic bonding (black lines) in (a) CrO4 <sup>2-</sup> , (b) HCrO4 <sup>-</sup> , and (c) Cr2O7 <sup>2-</sup> anions. ....                                                                                                                         | 5 |
| <b>Figure S 2.</b> Plot of ln(K <sub>eq</sub> ) vs 1/K. ....                                                                                                                                                                                                                                                                                                               | 5 |

## Force field parameters for the Cr<sup>VI</sup> anions

In order to simulate the interaction of activated carbon model with Cr<sup>VI</sup> ions, force field parameters have been derived. The molecular-mechanical models for Cr<sup>VI</sup> ions were described by the following potential function based on general Amber force field (GAFF) parameters [1], [2].

$$V(r) = \sum_{bonds} k_B(r - r_0)^2 + \sum_{angles} k_A(\varphi - \varphi_0)^2 + \sum_{dihedrals} \frac{k_D}{2} [1 + \cos(n\phi - \phi_0)] \\ + \sum_{pairs} \varepsilon_{ij} \left[ \left( \frac{R_{ij}}{r_{ij}} \right)^{12} - 2 \left( \frac{R_{ij}}{r_{ij}} \right)^6 \right] + \frac{1}{4\pi\varepsilon_0} \sum_{pairs} \frac{q_i q_j}{r_{ij}}$$

Atom-type assignment of Cr(VI) species and their inter-atomic bonding are specified in the supplementary Figure S 1 together with the values of the atomic charges  $q_i$ . The charges were fitted by RESP method [3] from the electrostatic potential evaluated by density functional theory (DFT) at PBE0 [4] /Aug-CC-pVDZ [5], [6] level on the optimized ionic structures by using Gaussian 16 package [7]. For the activated carbon molecule, the B3LYP/6-31G\* was used. For the Lennard-Jones-potential parameters  $R$  and  $\varepsilon$  were taken from the General Amber Force Field (GAFF) [1], [2] and applied without any modifications, the binding descriptors  $k_B$ ,  $k_A$ ,  $k_D$ ,  $r_0$ ,  $\varphi_0$ , and  $\phi_0$  were further refined in order to reproduce DFT vibrational frequencies of the considered Cr<sup>VI</sup> ions in the vacuum. The final binding parameters are listed in the supplementary Table S 1, Table S 2, Table S 3, and Table S 4, while the obtained vibrational frequencies are collected in supplementary Table S 5.

**Table S 1.** Atomic type parameters: atomic masses [AMU] and Lennard-Jones-potential parameters  $R$  [Å] and  $\varepsilon$  [kcal/mol].

| Type | Mass    | $R$    | $\varepsilon$ |
|------|---------|--------|---------------|
| ho   | 1.0008  | 0.0000 | 0.0000        |
| oc   | 15.9999 | 1.6612 | 0.2100        |
| od   | 15.9999 | 1.7210 | 0.2104        |
| oe   | 15.9999 | 1.6837 | 0.1700        |
| cr   | 51.9961 | 1.3440 | 0.0085        |

**Table S 2.** Bond type parameters: harmonic-potential force constant  $k_B$  [kcal/mol/Å<sup>2</sup>] and equilibrium distance  $r_0$  [Å].

| Bond  | $k_B$    | $r_0$  |
|-------|----------|--------|
| od-ho | 550.9524 | 0.9754 |
| cr-oc | 324.4167 | 1.6795 |
| cr-od | 231.5857 | 1.8497 |
| cr-oe | 260.1321 | 1.7946 |

**Table S 3.** Valence-angle type parameters: harmonic-potential force constant  $k_A$  [kcal/mol/deg<sup>2</sup>] and equilibrium angle value  $\varphi_0$  [deg].

| Angle    | $k_A$   | $\varphi_0$ |
|----------|---------|-------------|
| oc-cr-oc | 70.8771 | 109.471     |
| oc-cr-od | 70.8771 | 109.471     |
| oc-cr-oe | 70.8771 | 109.471     |
| cr-oe-cr | 46.7234 | 154.830     |
| cr-od-ho | 34.7476 | 107.065     |

**Table S 4.** Dihedral-angle type parameters: force constant  $k_D$  [kcal/mol], equilibrium angle value  $\phi_0$  [deg] and periodicity  $n$  (negative value denotes multi-term potential form).

| Dihedral    | $k_D$ | $\phi_0$ | $n$ |
|-------------|-------|----------|-----|
| oc-cr-od-ho | 2.3   | 180.0    | -2  |
| oc-cr-od-ho | 1.9   | 0.0      | 1   |
| oc-cr-oe-cr | 1.0   | 180.0    | 3   |

**Table S 5.** Comparison of vibrational frequencies [cm<sup>-1</sup>] of vacuum Cr<sup>VI</sup> anions as calculated in DFT (PBE0/Aug-CC-pVDZ) and in force field (FF) using the fitted parameters. The frequencies were calculated by the harmonic-approximation approach from the second derivatives of the total energy with respect to atomic coordinates.

| Mode | CrO <sub>4</sub> <sup>2-</sup> |       | HCrO <sub>4</sub> <sup>-</sup> |       | Cr <sub>2</sub> O <sub>7</sub> <sup>2-</sup> |       |
|------|--------------------------------|-------|--------------------------------|-------|----------------------------------------------|-------|
|      | DFT                            | FF    | DFT                            | FF    | DFT                                          | FF    |
| 1    | 316.5                          | 333.3 | 67.1                           | 0.0   | 15.4                                         | 0.0   |
| 2    | 316.6                          | 333.3 | 251.1                          | 290.0 | 32.7                                         | 0.0   |
| 3    | 356.5                          | 336.8 | 291.7                          | 298.6 | 39.2                                         | 71.7  |
| 4    | 356.5                          | 336.9 | 329.5                          | 300.4 | 205.0                                        | 200.2 |
| 5    | 356.7                          | 337.1 | 356.4                          | 323.6 | 206.3                                        | 212.7 |

|    |       |       |        |        |       |       |
|----|-------|-------|--------|--------|-------|-------|
| 6  | 807.7 | 691.5 | 363.9  | 341.6  | 210.5 | 215.0 |
| 7  | 834.0 | 834.0 | 623.0  | 618.8  | 303.4 | 300.0 |
| 8  | 834.0 | 834.1 | 769.3  | 748.7  | 321.4 | 316.9 |
| 9  | 834.2 | 834.1 | 911.8  | 832.6  | 358.9 | 320.6 |
| 10 |       |       | 956.7  | 833.2  | 358.9 | 321.4 |
| 11 |       |       | 977.3  | 977.4  | 361.5 | 322.3 |
| 12 |       |       | 3702.7 | 3702.7 | 365.3 | 327.3 |
| 13 |       |       |        |        | 366.3 | 391.8 |
| 14 |       |       |        |        | 476.6 | 517.7 |
| 15 |       |       |        |        | 812.4 | 714.4 |
| 16 |       |       |        |        | 883.8 | 743.9 |
| 17 |       |       |        |        | 906.0 | 830.2 |
| 18 |       |       |        |        | 926.3 | 831.6 |
| 19 |       |       |        |        | 931.2 | 832.2 |
| 20 |       |       |        |        | 932.2 | 837.4 |
| 21 |       |       |        |        | 938.4 | 938.0 |

**Figure S 1.** Atom types (red symbols), atomic point charges (black numbers, atomic units) and indicated inter-atomic bonding (black lines) in (a)  $\text{CrO}_4^{2-}$ , (b)  $\text{HCrO}_4^-$ , and (c)  $\text{Cr}_2\text{O}_7^{2-}$  anions.

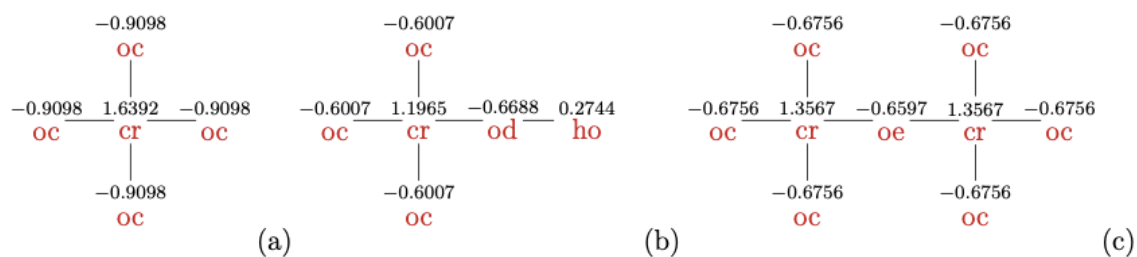

**Figure S 2.** Plot of  $\ln(\text{Keq})$  vs  $1/\text{K}$ .

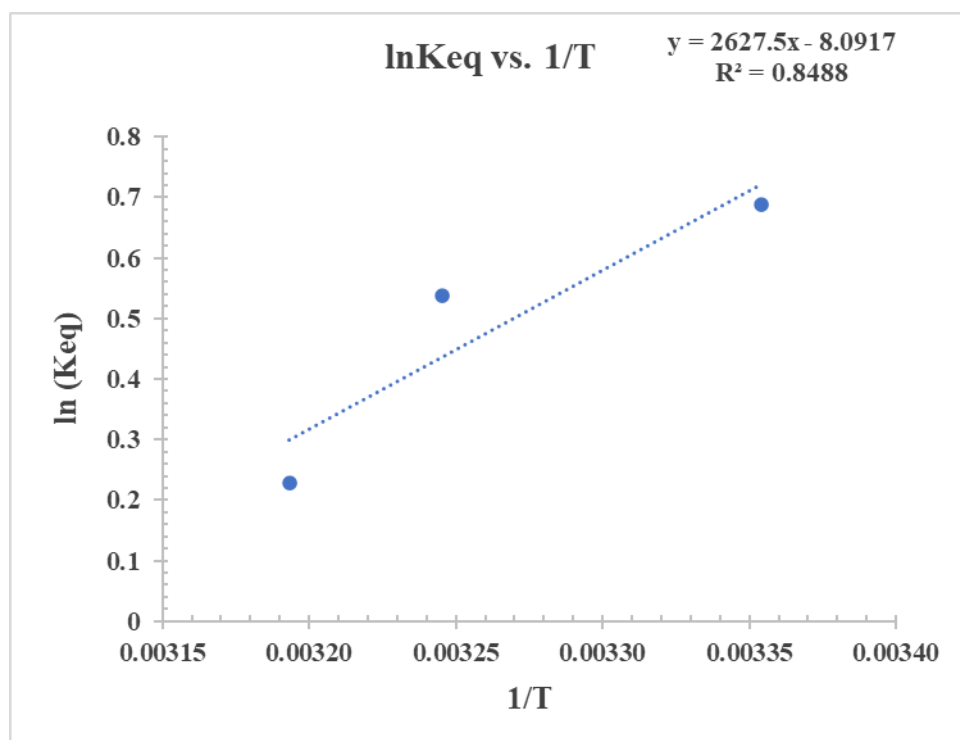

Supplement: s1 [file s1]
